# Supplementary material for: A theoretical study on the catalytic role of water in methanol steam reforming on PdZn(111)
Source: Royal Society of Chemistry journal article supplement (doi:10.1039/c5cy00016e), 2015-01-01
Supplement: c5cy00016e1.pdf [file c5cy00016e1.pdf]

## Supporting Information

### Theoretical study on the catalytic role of water in methanol steam reforming on PdZn(111)

Zheng-Qing Huang,<sup>a</sup> Bo Long<sup>b</sup> and Chun-Ran Chang<sup>\*a</sup>

<sup>a</sup> School of Chemical Engineering and Technology, Xi'an Jiaotong University, Xi'an 710049, China

<sup>b</sup> College of Information Engineering, Guizhou Minzu University, Guiyang 550025, China

**Table S1** Comparison of the adsorption energies of key species with and without co-adsorbed water

| Species             | $E_{\text{ads}}^a$<br>/ eV | $E_{\text{co-ads}}^b$<br>/ eV | $\Delta E_{\text{ads}}^c$<br>/ eV | $d(\text{O}\cdots\text{H})^d$<br>/ Å |
|---------------------|----------------------------|-------------------------------|-----------------------------------|--------------------------------------|
| H <sub>2</sub> O    | -0.33                      | -0.95                         | -0.29                             | 1.70                                 |
| CH <sub>3</sub> OH  | -0.39                      | -0.99                         | -0.27                             | 1.71                                 |
| CH <sub>3</sub> O   | -2.32                      | -2.73                         | -0.08                             | 1.49                                 |
| H <sub>2</sub> COOH | -2.09                      | -2.70                         | -0.28                             | 1.75                                 |
| HCOOH               | -0.39                      | -0.89                         | -0.17                             | 1.81                                 |
| <i>bi</i> -HCOO     | -2.73                      | -3.33                         | -0.27                             | 1.80                                 |
| <i>mono</i> -HCOO   | -2.24                      | -2.84                         | -0.27                             | 1.59                                 |

<sup>a</sup> The adsorption energy of separated key species. <sup>b</sup> The co-adsorption energy of key species and a water molecule. <sup>c</sup>  $\Delta E_{\text{ads}} = E_{\text{co-ads}} - (E_{\text{ads}} + E_{\text{ads}(\text{H}_2\text{O})})$ , where  $E_{\text{ads}(\text{H}_2\text{O})}$  refers to the adsorption energy (-0.33 eV) of a separated H<sub>2</sub>O. <sup>d</sup> The length of hydrogen bond between water and key species.

**Table S2** Activation barriers ( $E_a$ ) and reaction energies ( $\Delta E$ ) of the dehydrogenation of methanol and methoxyl at different water coverages

| Elementary reaction                                                                                                     | $E_a$ / eV | $\Delta E$ / eV |
|-------------------------------------------------------------------------------------------------------------------------|------------|-----------------|
| $\text{CH}_3\text{OH}^* \rightarrow \text{CH}_3\text{O}^* + \text{H}^*$                                                 | 1.27       | 0.15            |
| $\text{CH}_3\text{OH}^* + \text{H}_2\text{O}^* \rightarrow \text{CH}_3\text{O}^* + \text{H}^* + \text{H}_2\text{O}^*$   | 0.86       | 0.29            |
| $\text{CH}_3\text{OH}^* + 2\text{H}_2\text{O}^* \rightarrow \text{CH}_3\text{O}^* + \text{H}^* + 2\text{H}_2\text{O}^*$ | 0.91       | 0.37            |
| $\text{CH}_3\text{OH}^* + 3\text{H}_2\text{O}^* \rightarrow \text{CH}_3\text{O}^* + \text{H}^* + 3\text{H}_2\text{O}^*$ | 0.89       | 0.42            |
| $\text{CH}_3\text{O}^* \rightarrow \text{HCHO}^* + \text{H}^*$                                                          | 1.41       | 1.18            |
| $\text{CH}_3\text{O}^* + \text{H}_2\text{O}^* \rightarrow \text{HCHO}^* + \text{H}^* + \text{H}_2\text{O}^*$            | 1.16       | 0.60            |
| $\text{CH}_3\text{O}^* + 2\text{H}_2\text{O}^* \rightarrow \text{HCHO}^* + \text{H}^* + 2\text{H}_2\text{O}^*$          | 1.01       | 0.49            |
| $\text{CH}_3\text{O}^* + 3\text{H}_2\text{O}^* \rightarrow \text{HCHO}^* + \text{H}^* + 3\text{H}_2\text{O}^*$          | 1.16       | 0.61            |

**Table S3** Activation barriers ( $E_a$ ) and reaction energies ( $\Delta E$ ) of formaldehyde dehydrogenation with and without the assistance of water

| Elementary reaction                                                                                   | $E_a$ / eV | $\Delta E$ / eV |
|-------------------------------------------------------------------------------------------------------|------------|-----------------|
| $\text{HCHO}^* \rightarrow \text{HCO}^* + \text{H}^*$                                                 | 0.91       | 0.24            |
| $\text{HCHO}^* + \text{H}_2\text{O}^* \rightarrow \text{HCO}^* + \text{H}^* + \text{H}_2\text{O}^*$   | 0.88       | 0.28            |
| $\text{HCHO}^* + 2\text{H}_2\text{O}^* \rightarrow \text{HCO}^* + \text{H}^* + 2\text{H}_2\text{O}^*$ | 0.87       | 0.12            |
